# Supplementary material for: Development of a horseradish peroxidase-nanobody fusion protein for visual detection of ochratoxin A by dot immunoassay
Source: Royal Society of Chemistry journal article supplement (doi:10.1039/d0ra06576e), 2020-01-01
Supplement: d0ra06576e1.pdf [file d0ra06576e1.pdf]

Electronic Supplementary Material (ESI) for RSC Advances.

This journal is © The Royal Society of Chemistry 2020

## Supporting Information

### **Development of a horseradish peroxidase-nanobody fusion protein for visual detection of ochratoxin A by dot immunoassay**

Qi Chen,<sup>ab‡</sup> Yuanyuan Wang,<sup>ab‡</sup> Fujing Mao,<sup>ab</sup> Benchao Su,<sup>ab</sup> Kunlu Bao,<sup>ab</sup> Zeling Zhang,<sup>ab</sup> Guifang Xie,<sup>ab</sup> Xing Liu<sup>ab\*</sup>

<sup>a</sup> College of Food Science and Engineering, Hainan University, Haikou 570228, China.

<sup>b</sup> Key Laboratory of Food Nutrition and Functional Food of Hainan Province, Haikou 570228, China.

qichen@hainanu.edu.cn; wangyuanyuan@hainanu.edu.cn; maofujing11@163.com;

benchao312@hainanu.edu.cn;

baokunlu@hainanu.edu.cn;

zhangzeling@hainanu.edu.cn; xgf@hainanu.edu.cn;

<sup>‡</sup> These authors contributed equally to this work

\*Corresponding Author: Tel./Fax: +86-898-66193581; e-mail: xliu@hainanu.edu.cn

(X.L.).

**Table of contents**

Table S1.....s-3  
Fig. S1.....s-4  
Table S2.....s-5  
Fig. S2.....s-6  
Fig. S3.....s-7  
Fig. S4.....s-8  
Table S3.....s-9  
Fig. S5.....s-10  
References.....s-11

**Table S1** The primers for constructing the recombinant plasmids pET25b-Nb28-HRP and pET25b-HRP-Nb28

| Name  | The sequence of primers                                          | Protein | Recombinant plasmid |
|-------|------------------------------------------------------------------|---------|---------------------|
| HN-HF | GGAATTCC <u>CATATG</u> CAGTTAACGCCGACTTTCTA<br>CGATAAC           | HRP     | PET25b-HRP-Nb28     |
| HN-HR | CCGCCAGAGCCACCTCCGCCTGAACCGCCTCC<br>TCCTGAGTTCGAGTTTACGACTCGGC   |         |                     |
| HN-NF | G TTCAGGCGGAGGTGGCTCTGGCGGTGGCGG<br>ATCCATGGCCATGGCCCAGTTGC      | Nb28    |                     |
| HN-NR | ATAAGAAT <u>GCGGCCG</u> CTTGTGGTTTTGGTGTC<br>TTGGGTTC            |         |                     |
| NH-NF | GGAATTCC <u>CATATG</u> ATGGCCATGGCCCAGTTGC                       | Nb28    | PET25b-Nb28-HRP     |
| NH-NR | CCGCCAGAGCCACCTCCGCCTGAACCGCCTCC<br>TCCTTGTGGTTTTGGTGTCTTGGGTTC  |         |                     |
| NH-HF | G TTCAGGCGGAGGTGGCTCTGGCGGTGGCGG<br>ATCCCAGTTAACGCCGACTTTCTACGAT | HRP     |                     |
| NH-HR | ATAAGAAT <u>GCGGCCG</u> CTGAGTTCGAGTTTACG<br>ACTCG               |         |                     |

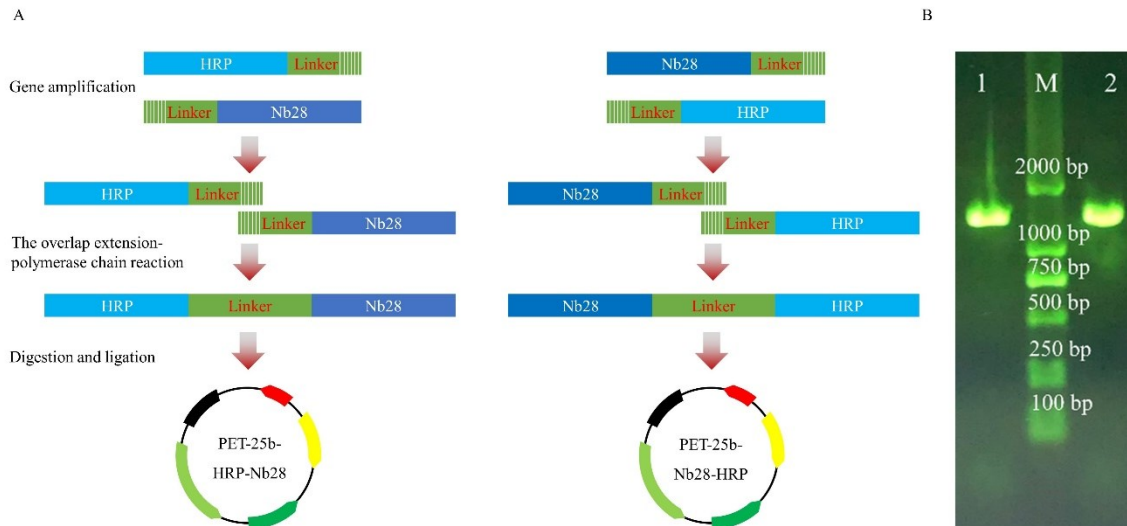

**Fig.S1** Construction of the recombinant plasmids pET25b-HRP-Nb28 and pET25b-Nb28-HRP (A) and DNA agarose analysis of the gene fragments of HRP-Nb28 and Nb28-HRP (B). Lane 1: HRP-Nb28 fragment; Lane 2: Nb28-HRP fragment; M: D2000 DNA Ladder.

**Table S2** Amino acid sequences of the fragments of HRP-Nb28 and Nb28-HRP

| DNA fragment | Amino acid sequence (5'-3')                                                                                                                                                                                                                                                                                                                                                                                                                                                                            |
|--------------|--------------------------------------------------------------------------------------------------------------------------------------------------------------------------------------------------------------------------------------------------------------------------------------------------------------------------------------------------------------------------------------------------------------------------------------------------------------------------------------------------------|
| Nb28-HRP     | MAMAQLQLVESGGGLVQAGGSLRLSCAASGSTVGVNAMDMGWYRQ<br>APGKQRELVAAIINGGGSTNLADSVKGRFTISRDKAKRTLYLQMNSLK<br>PEDTAVYYCYVRSGLVYWGQGTQVTVSSEPKTPKQGGGGGGGG<br>GSGGGGSQLTPTFYDNPCPNVSNIVRDTIVNELRSDPRIAASILRLHFHD<br>CFVNGCDASILLDNTTSFRTEKDAFGNANSARGFPVIDRMKAAVESAC<br>PRTVSCADLLTIAAQSVTLAGGPSWRVPLGRRDSLQAFDLANANLP<br>APFFTLPLKDSFRNVGLNRSSDLVALSGGHTFGKNQCRFIMDRLYNFS<br>NTGLPDPTLNTTYLQTLRGLCPLNGNLSALVDFDLRTPTIFDNKYVNL<br>EEQKGLIQSDQELFSSPNATDTIPLVRSFANSTQTFNFAFVEAMDRMGN<br>ITPLTGTGGQIRLNCRVVNSNS    |
| HRP-Nb28     | QLTPTFYDNPCPNVSNIVRDTIVNELRSDPRIAASILRLHFHDCFVNGCD<br>ASILLDNTTSFRTEKDAFGNANSARGFPVIDRMKAAVESACPRTVSCA<br>DLLTIAAQSVTLAGGPSWRVPLGRRDSLQAFDLANANLPAPFFTLPL<br>QLKDSFRNVGLNRSSDLVALSGGHTFGKNQCRFIMDRLYNFSNTGLPD<br>PTLNTTYLQTLRGLCPLNGNLSALVDFDLRTPTIFDNKYVNL EEQKGL<br>IQSDQELFSSPNATDTIPLVRSFANSTQTFNFAFVEAMDRMGNITPLTGT<br>QGQIRLNCRVVNSNSGGGGGGGGGGGGSMAMAQLQLVESGGGLV<br>QAGGSLRLSCAASGSTVGVNAMDMGWYRQAPGKQRELVAAIINGGG<br>STNLADSVKGRFTISRDKAKRTLYLQMNSLKPEDTAVYYCYVRSGLV<br>LVYWGQGTQVTVSSEPKTPKQ |

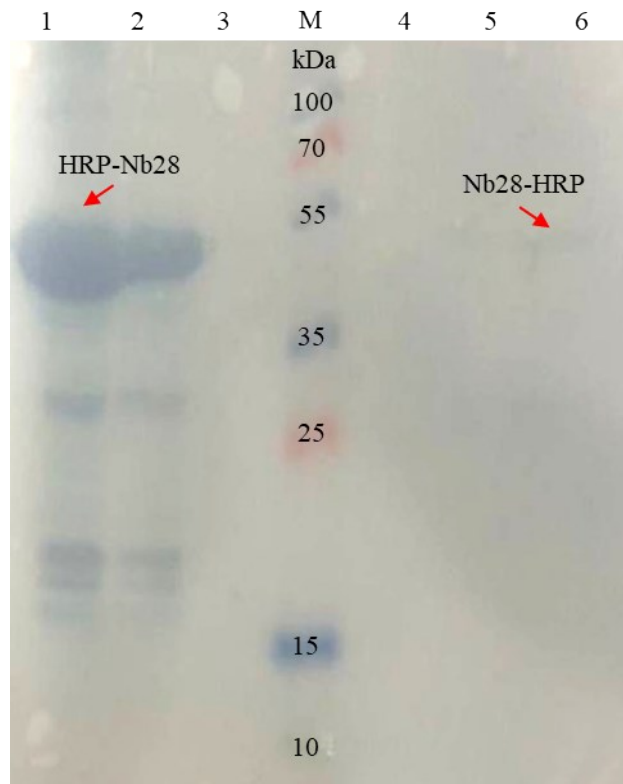

**Fig.S2** Western blot analysis of the auto-induction expression of fusion proteins HRP-Nb28 (left) and Nb28-HRP (right). Lane 1 and 6: The precipitated protein of the induced *E.coli* cell after sonication; Lane 2 and 5: Total protein of the induced *E.coli* cell; lane 3 and 4: The supernatant protein of the induced *E.coli* cell after sonication; lane M: Prestained protein ladder. The red arrows point to the target proteins.

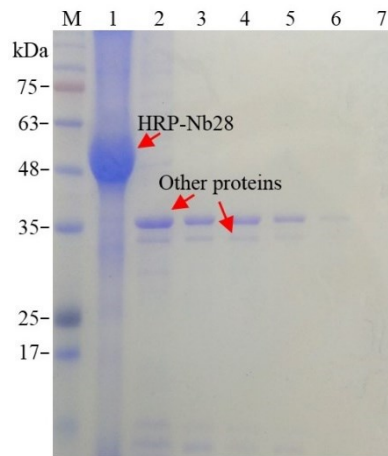

**Fig. S3** SDS-PAGE analysis of the purification of HRP-Nb28 inclusion body. Lane M: Prestained protein ladder; Lane 1: The purified inclusion body; Lane 2-4: Supernatants collected after washing the inclusion body with wash buffer I; Lane 5-7: Supernatants collected after washing the inclusion body with wash buffer II.

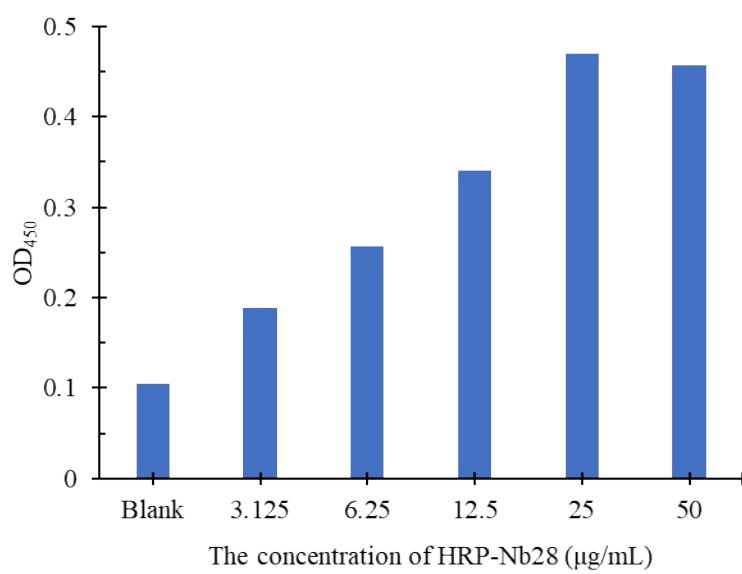

**Fig. S4** The performance analysis of HRP-Nb28 fusion protein



**Table S3** Comparison of the proposed method with other reported OTA detection methods

| No. | Methods    | Cut-off value | Detection time | References |
|-----|------------|---------------|----------------|------------|
| 1   | Dot ELISA  | 10 ng/mL      | 10 min         | This work  |
| 2   | Test strip | 16 ng/mL      | 10 min         | 1          |
| 3   | Test strip | 5 ng/mL       | 5-10 min       | 2          |
| 4   | Dot ELISA  | 0.625 ng/mL   | 21 min         | 3          |
| 5   | Dot ELISA  | 0.3125 ng/mL  | < 6 min        | 4          |

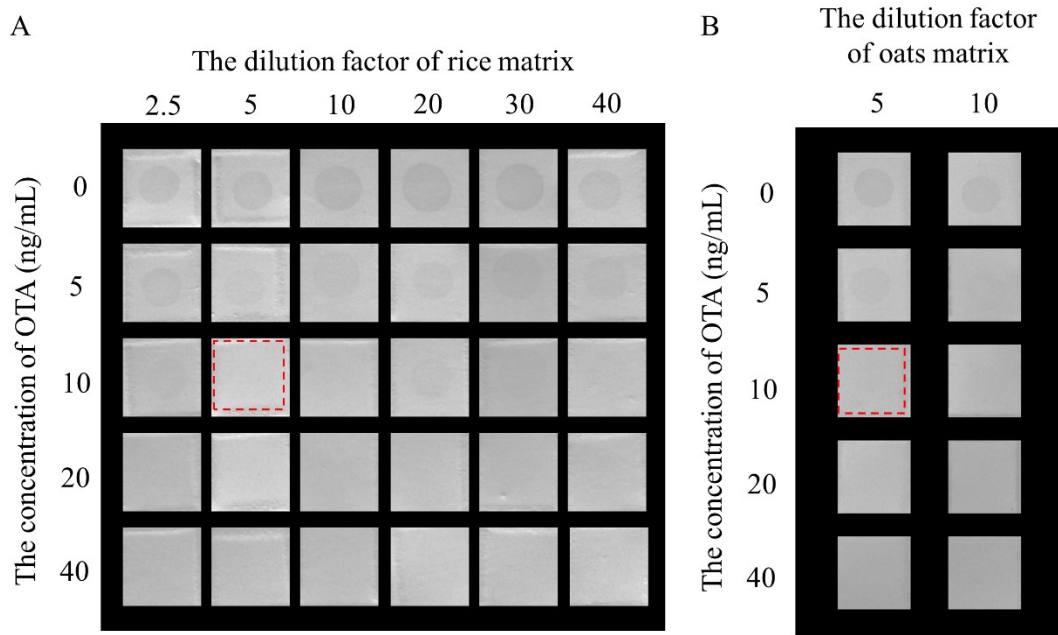

**Fig.S5** Evaluation of the matrix effect of rice (A) and oats (B) samples at different dilutions on the performance of HN-DIA.

## References

- (1) Cheng, Y.; Liu, L.; Liu, H.; Xu, L.; Kuang, H. Rapid and sensitive detection of ochratoxin A in rice flour using a fluorescent microsphere immunochromatographic test strip assay. *Food and Agricultural Immunology*. **2020**, *31*, 563-574.
- (2) Liu, L.; Xu, L.; Suryoprabowo, S.; Song, S.; Kuang, H. Development of an immunochromatographic test strip for the detection of ochratoxin A in red wine. *Food and Agricultural Immunology*. **2017**, 1-11.
- (3) Sun, Z.; Duan, Z.; Liu, X.; Deng, X.; Tang, Z. Development of a nanobody-based competitive dot ELISA for visual screening of ochratoxin A in cereals. *Food Analytical Methods*. **2017**, *10*, 3558-3564.
- (4) Tang, Z.; Wang, X.; Lv, J.; Hu, X.; Liu, X. One-step detection of ochratoxin A in cereal by dot immunoassay using a nanobody-alkaline phosphatase fusion protein. *Food Control*. **2018**, *92*, 430-436.
